# Supplementary material for: Energy renormalization for temperature transferable coarse-graining of silicone polymer
Source: Royal Society of Chemistry journal article supplement (doi:10.1039/d3cp05969c), 2024-01-01
Supplement: d3cp05969c1.pdf [file d3cp05969c1.pdf]

# **Supporting Information for**

## **Energy Renormalization for Temperature Transferable**

## **Coarse-graining of Silicone Polymer**

Dawei Zhang,<sup>1</sup> Yang Wang,<sup>2</sup> Maryam Safaripour,<sup>3</sup> Daniel A. Bellido-Aguilar,<sup>3</sup> Kurt  
R. VanDonselaar,<sup>4</sup> Dean C. Webster,<sup>3</sup> Andrew B. Croll,<sup>4</sup> Wenjie Xia<sup>5\*</sup>

<sup>1</sup> *Department of Civil, Construction, and Environmental Engineering, North Dakota  
State University, Fargo, ND 58108, United States*

<sup>2</sup> *Zernike Institute for Advanced Materials, University of Groningen, 9747 AG,  
Groningen, Netherlands*

<sup>3</sup> *Department of Coatings and Polymeric Materials, North Dakota State University,  
Fargo, ND 58108, United States*

<sup>4</sup> *Department of Physics, North Dakota State University, Fargo, ND 58108, United  
States*

<sup>5</sup> *Department of Aerospace Engineering, Iowa State University, Ames, IA 50011,  
United States*

\*Corresponding author: [wxia@iastate.edu](mailto:wxia@iastate.edu)

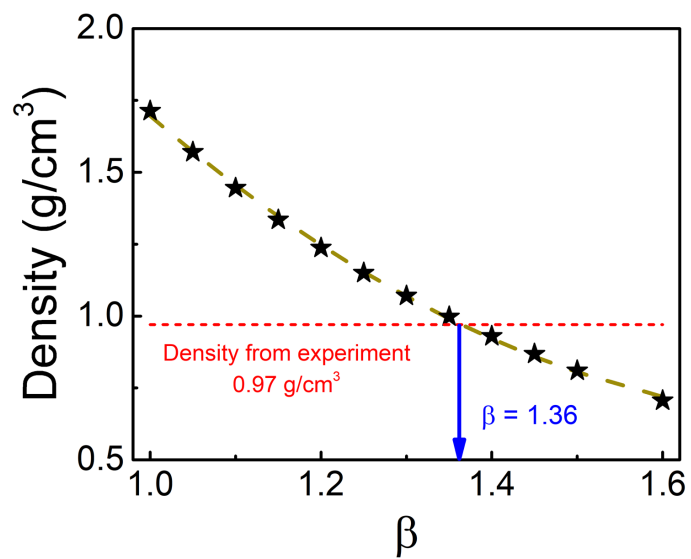

**Figure S1.** The density changes of PDMS CG model with varying  $\beta$  values at 300 K, with the experimental density of PDMS showing in red dashed horizontal line. To match the experimental density value, the  $\beta$  is determined as 1.36.

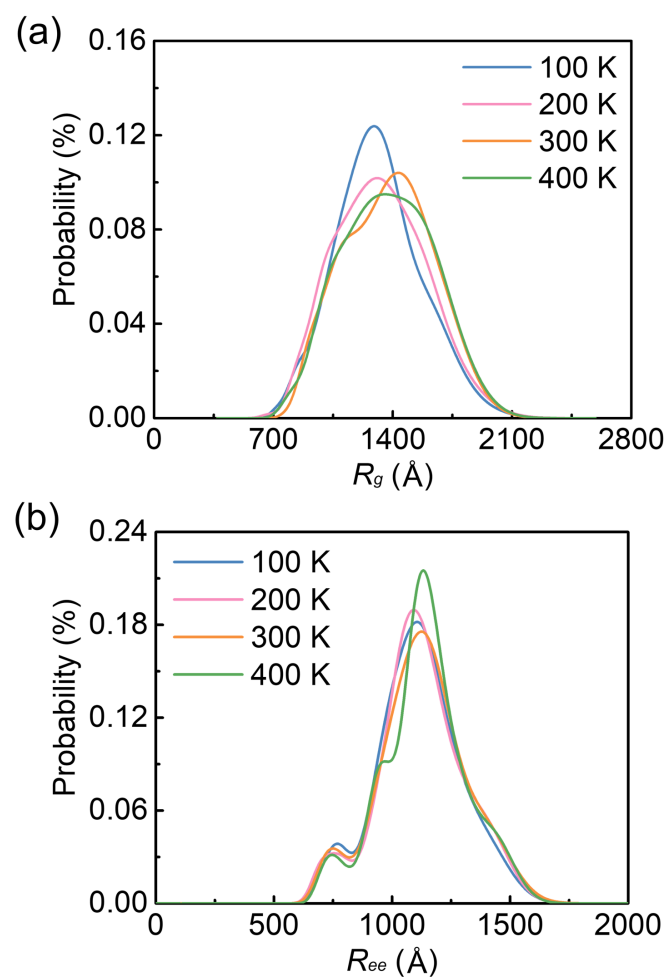

**Fig. S2.** Probability distribution of the conformational behaviors of the PDMS CG model at different temperature (a):  $R_g$ . (b)  $R_e$ .

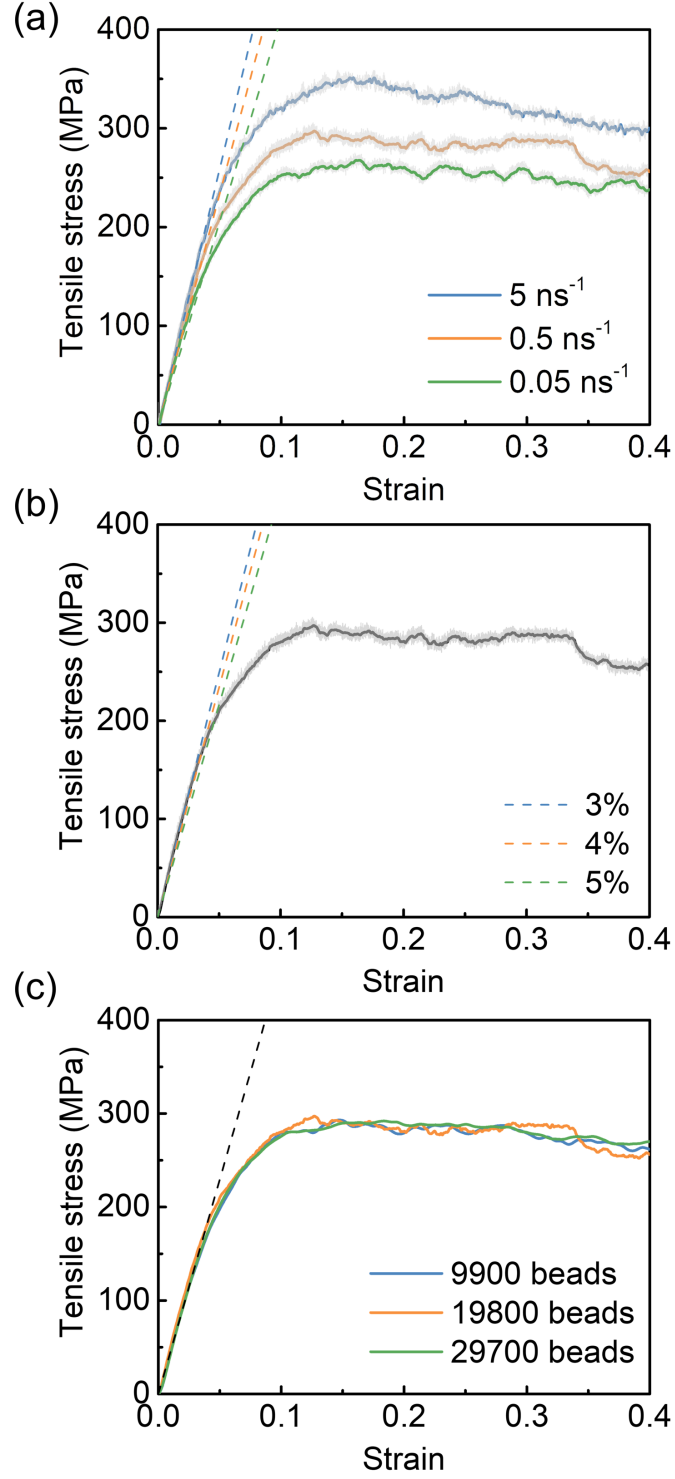

**Fig. S3.** Tensile stress-strain curves of the PDMS CG model at different strain rates, elastic strain ranges, and system sizes (a) strain rates of 5 ns<sup>-1</sup>, 0.5 ns<sup>-1</sup>, and 0.05 ns<sup>-1</sup>; (b) elastic strain ranges of 3%, 4%, 5%; (c) system sizes of 9900 beads, 19800 beads, and 29700 beads.

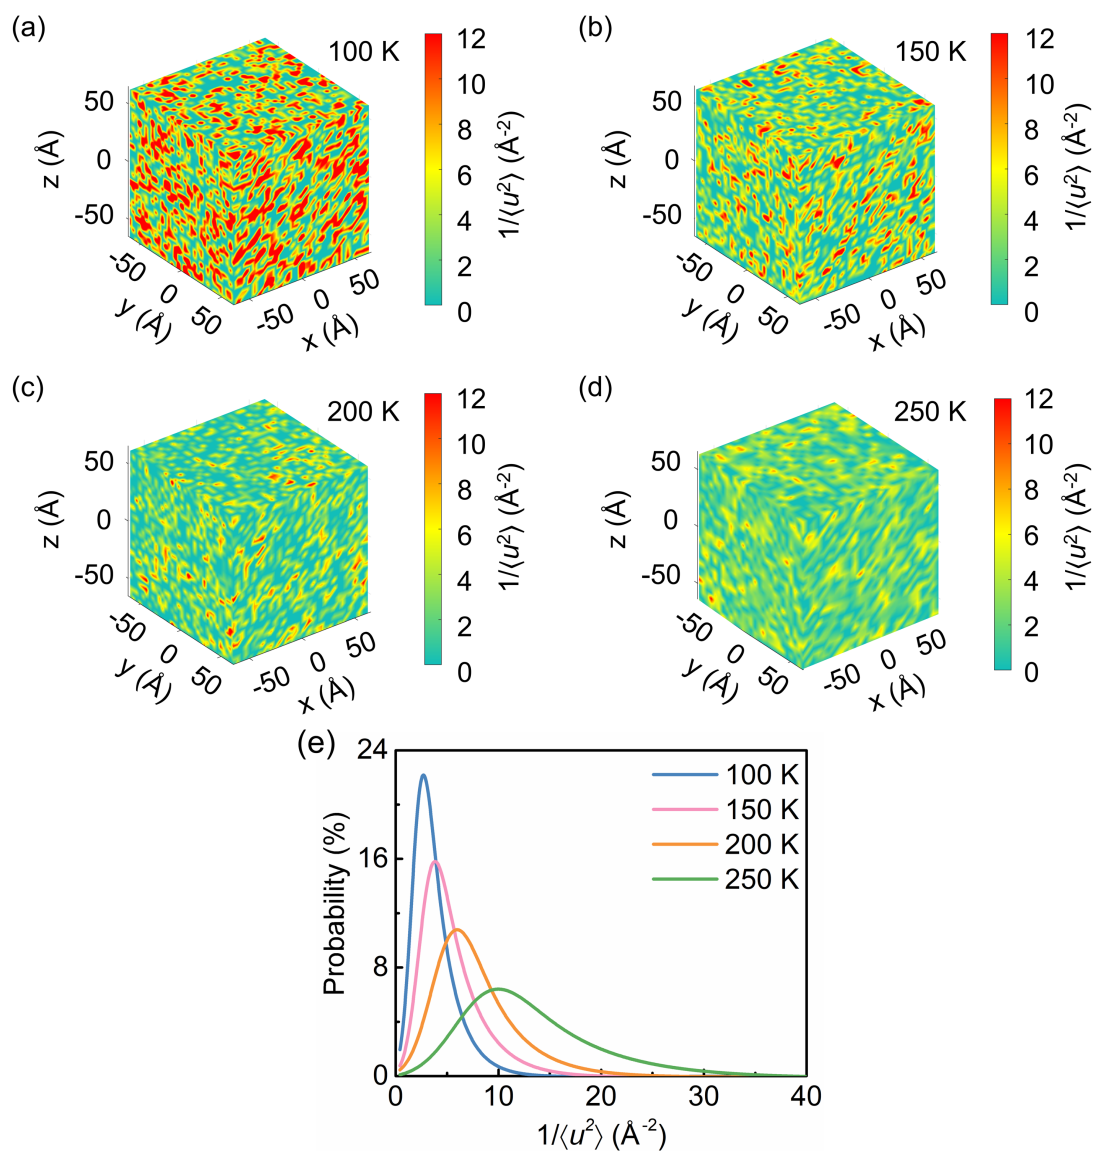

**Fig. S4.** (a ~ d) Representative color maps of  $1/\langle u^2 \rangle$  for PDMS CG model at different temperatures. (a): 100 K; (b) 150 K; (c) 200 K; (d) 250 K; (e) Probability distributions of  $1/\langle u^2 \rangle$  for the PDMS CG model at different temperatures.

**Table S1.** Young's modulus of AA and CG models from 100 K to 250 K.

| <b>Temperature (K)</b> | <b><math>1/\langle u^2 \rangle</math> (<math>\text{\AA}^{-2}</math>)</b> | <b>E-AA model (GPa)</b> | <b>E-CG model (GPa)</b> |
|------------------------|--------------------------------------------------------------------------|-------------------------|-------------------------|
| 100                    | 9.3986                                                                   | 4.44                    | 4.68                    |
| 125                    | 7.0656                                                                   | 4.11                    | 4.24                    |
| 150                    | 5.7348                                                                   | 3.8                     | 3.89                    |
| 175                    | 4.5092                                                                   | 3.53                    | 3.58                    |
| 200                    | 3.5693                                                                   | 3.21                    | 3.34                    |
| 225                    | 3.0146                                                                   | 2.88                    | 3.03                    |
| 250                    | 2.3909                                                                   | 2.53                    | 2.71                    |
